# Supplementary material for: Improving prescribing practices with rapid diagnostic tests (RDTs): synthesis of 10 studies to explore reasons for variation in malaria RDT uptake and adherence
Source: PubMed Central journal article supplement (PMC5353269; doi:10.1136/bmjopen-2016-012973), 2017-03-08
Supplement: bmjopen-2016-012973supp2.pdf [file bmjopen-2016-012973supp2.pdf]

Supplementary file 2: Sample of data extraction table for 'adherence to negative mRDT results': selected characteristics only

| Case     | No AM to negative RDT % | Intervention content | Duration of RDT/ malaria-focused training | Training style for RDT/ malaria training | Training on how to treat patients with negative RDT results? | Training covered skills around communicating with patients? | Support supervision                                                   | Additional intervention components |
|----------|-------------------------|----------------------|-------------------------------------------|------------------------------------------|--------------------------------------------------------------|-------------------------------------------------------------|-----------------------------------------------------------------------|------------------------------------|
| Nig1/a3  | 27                      | Enhanced             | 2                                         | Interactive                              | Yes, though minimal                                          | Yes                                                         | Yes<br>- monthly, with feedback, and telephone support                | Yes (school-based activities)      |
| Cam1/a1  | 47                      | Basic                | 1                                         | Didactic                                 | Yes                                                          | No                                                          | Yes<br>- monthly, with feedback                                       | No                                 |
| Cam1/b1  | 49                      | Basic                | 1                                         | Didactic                                 | Yes                                                          | No                                                          | Yes<br>- monthly, with feedback                                       | No                                 |
| Ghan1/b  | 51                      | Basic                | 2                                         |                                          | Yes                                                          | No                                                          | No                                                                    | No                                 |
| Ghan1/a  | 54                      | Basic                | 2                                         |                                          | Yes                                                          | No                                                          | No                                                                    | No                                 |
| Nig1/a1  | 56                      | Basic                | 0.5                                       | Didactic                                 | No                                                           | No                                                          | No                                                                    | No                                 |
| Nig1/b1  | 57                      | Basic                | 0.5                                       | Didactic                                 | No                                                           | No                                                          | No                                                                    | No                                 |
| Nig1/a2  | 65                      | Enhanced             | 2                                         | Interactive                              | Yes, though minimal                                          | Yes                                                         | Yes<br>- monthly, with feedback, and telephone support                | No                                 |
| Afgh1/c  | 65                      | Basic                | 1.5                                       | Didactic                                 | No                                                           | No                                                          | No                                                                    | No                                 |
| Nig1/b2  | 70                      | Enhanced             | 2                                         | Interactive                              | Yes, though minimal                                          | Yes                                                         | Yes<br>- monthly, with feedback, and telephone support                | No                                 |
| Cam1/a2  | 76                      | Enhanced             | 3                                         | Interactive                              | Yes                                                          | Yes                                                         | Yes<br>- monthly, with feedback                                       | No                                 |
| Cam1/b2  | 77                      | Enhanced             | 3                                         | Interactive                              | Yes                                                          | Yes                                                         | Yes<br>- monthly, with feedback                                       | No                                 |
| Tanz2/a1 | 77                      | Basic                | 1                                         | Didactic                                 | No                                                           | No                                                          | No                                                                    | No                                 |
| Tanz2/2  | 78                      | Basic                | 2                                         | Didactic                                 | No                                                           | No                                                          | No                                                                    | No                                 |
| Afgh1/b  | 81                      | Basic                | 1.5                                       | Didactic                                 | No                                                           | No                                                          | No                                                                    | No                                 |
| Nig1/b3  | 81                      | Enhanced             | 2                                         | Interactive                              | Yes, though minimal                                          | Yes                                                         | Yes<br>- monthly, with feedback on performance, and telephone support | Yes (school-based activities)      |
| Tanz1/b  | 85                      | Basic                | 2                                         | Didactic                                 | No                                                           | No                                                          | Yes<br>- 32% had received supervision on use of RDTs; 29% on ACTs     | No                                 |

\*Intervention explicitly designed to address and support the process of change in implementing RDTs, beyond knowledge and equipment, e.g. training content and methods reflected how new ideas and demands will work in practice, e.g. reflection-feedback opportunities, multiple sessions of training, role plays and feedback.

| Case     | No AM to negative RDT % | Intervention content | Duration of RDT/ malaria-focused training          | Training style for RDT/ malaria training | Training on how to treat patients with negative RDT results? | Training covered skills around communicating with patients? | Support supervision                                                    | Additional intervention components                                                          |
|----------|-------------------------|----------------------|----------------------------------------------------|------------------------------------------|--------------------------------------------------------------|-------------------------------------------------------------|------------------------------------------------------------------------|---------------------------------------------------------------------------------------------|
| Afgh1/a  | 87                      | Basic                | 1.5                                                | Didactic                                 | No                                                           | No                                                          | No                                                                     | No                                                                                          |
| Tanz2/b1 | 90                      | Basic                | 1                                                  | Didactic                                 | No                                                           | No                                                          | No                                                                     | No                                                                                          |
| Tanz1/a  | 90                      | Basic                | 2                                                  | Didactic                                 | No                                                           | No                                                          | Yes<br>- 26% had received supervision on use of RDTs; 31% on ACTs      | No                                                                                          |
| Tanz2/3  | 92                      | Enhanced             | 3                                                  | Interactive                              | Yes                                                          | Yes                                                         | ?                                                                      | Yes (feedback & motivational text messages)                                                 |
| Tanz2/4  | 95                      | Enhanced             | 3                                                  | Interactive                              | Yes                                                          | Yes                                                         | ?                                                                      | Yes (feedback & motivational text messages; patient leaflets)                               |
| Tanz1/c  | 96                      | Basic                | 2                                                  | Didactic                                 | No                                                           | No                                                          | Yes<br>- 22% had received supervision on use of RDTs; 19% on ACTs      | No                                                                                          |
| Uga1     | 97                      | Enhanced             | 3                                                  | Didactic                                 | Yes                                                          | Yes                                                         | Yes<br>- at one week, 6 weeks and 6 months, with feedback              | Yes (training on patient-centred services, training in-charges in health centre management) |
| Uga2/a   | 97                      | Enhanced             | 4                                                  | Interactive                              | Yes, though minimal                                          | Yes                                                         | Yes<br>- close supervision for first 6 months (before evaluation)      | Yes (community sensitisation)                                                               |
| Uga2/b   | 99                      | Enhanced             | 4                                                  | Interactive                              | Yes, though minimal                                          | Yes                                                         | Yes<br>- close supervision for first 6 months (before evaluation)      | Yes (community sensitisation)                                                               |
| Uga3     | 99                      | Enhanced             | 4                                                  | Interactive                              | Yes, though minimal                                          | Yes                                                         | Yes<br>- weekly, with feedback, for first 2 months (before evaluation) | Yes (community sensitisation)                                                               |
| Tanz3    | 100                     | Enhanced             | d/k (6-11 for all IMCI training, not just malaria) | Interactive                              | Yes                                                          | Yes                                                         | Yes                                                                    | Yes (IMCI training, salary for providers)                                                   |

\*Intervention explicitly designed to address and support the process of change in implementing RDTs, beyond knowledge and equipment, e.g. training content and methods reflected how new ideas and demands will work in practice, e.g. reflection-feedback opportunities, multiple sessions of training, role plays and feedback.

\*Intervention explicitly designed to address and support the process of change in implementing RDTs, beyond knowledge and equipment, e.g. training content and methods reflected how new ideas and demands will work in practice, e.g. reflection-feedback opportunities, multiple sessions of training, role plays and feedback.
